# Supplementary material
Source: HighWire-hosted journal article supplement (https://openheart.bmj.com/content/7/1/e001204)
Supplement: inline-supplementary-material-2 [file inline-supplementary-material-2.pdf]

**Supplemental Table 2** Lesion and procedural characteristic of patients with bioresorbable vascular scaffold (BVS) implantation

| Treated lesions                             | Bioresorbable vascular scaffolds (BVS) |            |         | Drug eluting metallic stents (DES) |            |         |
|---------------------------------------------|----------------------------------------|------------|---------|------------------------------------|------------|---------|
|                                             | NCB group                              | SCB group  | p-value | NCB group                          | SCB group  | p-value |
| <b>AHA Lesion classification</b>            |                                        |            | 0.31    |                                    |            | 0.45    |
| - Type A                                    | 0 (0.0%)                               | 0 (0.0%)   |         | 1 (5.6%)                           | 0 (0.0%)   |         |
| - Type B1                                   | 10 (35.7%)                             | 5 (17.9%)  |         | 3 (16.7%)                          | 3 (16.7%)  |         |
| - Type B2                                   | 8 (28.5%)                              | 10 (35.7%) |         | 7 (38.9%)                          | 7 (38.9%)  |         |
| - Type C                                    | 10 (35.7%)                             | 13 (46.4%) |         | 7 (38.9%)                          | 13 (56.5%) |         |
| <b>Baseline calcification</b>               |                                        |            | 0.67    |                                    |            | 0.53    |
| - None                                      | 24 (85.7%)                             | 26 (92.8%) |         | 13 (72.2%)                         | 15 (65.2%) |         |
| - Moderate                                  | 4 (14.3%)                              | 2 (7.1%)   |         | 5 (27.8%)                          | 7 (30.4%)  |         |
| - Severe                                    | 0 (0.0%)                               | 0 (0.0%)   |         | 0 (0.0%)                           | 1 (4.3%)   |         |
| <b>Bifurcation lesion</b>                   | 1 (3.5%)                               | 4 (14.3%)  | 0.35    | 2 (11.1%)                          | 9 (39.1%)  | 0.075   |
| <b>Thrombus</b>                             | 1 (3.5%)                               | 0 (0.0%)   | 1.00    | 0 (0.0%)                           | 0 (0.0%)   | -       |
| <b>Lesion length (mm)</b>                   | 19.9±11.6                              | 20.9±9.5   | 0.71    | 18.8±9.4                           | 22.3±10.1  | 0.26    |
| <b>Direct stenting</b>                      | 0 (0.00%)                              | 0 (0.0%)   | -       | 0 (0.0%)                           | 2 (8.7%)   | 0.99    |
| <b>Pre-dilatation balloon diameter (mm)</b> | 2.83±0.54                              | 2.80±0.38  | 0.48    | 2.67±0.51                          | 2.71±0.38  | 0.75    |
| - 1.5                                       | 2 (4.7%)                               | 0 (0.0%)   |         | 1 (3.3%)                           | 0 (0.0%)   |         |
| - 2.0                                       | 3 (7.1%)                               | 1 (3.1%)   |         | 5 (16.6%)                          | 3 (9.7%)   |         |
| - 2.5                                       | 11 (26.2%)                             | 15 (46.9%) |         | 11 (36.6%)                         | 14 (45.2%) |         |
| - 3.0                                       | 18 (42.8%)                             | 12 (37.5%) |         | 9 (30.0%)                          | 12 (38.7%) |         |
| - 3.5                                       | 7 (16.6%)                              | 4 (12.5%)  |         | 4 (13.3%)                          | 2 (6.4%)   |         |
| - 4.0                                       | 1 (2.4%)                               | 0 (0.0%)   |         | 0 (0.0%)                           | 0 (0.0%)   |         |

|                                              |            |            |         |            |             |         |
|----------------------------------------------|------------|------------|---------|------------|-------------|---------|
| <b>Pre-dilatation pressure (atm.)</b>        | 24.6±7.4   | 14.0±2.8   | <0.0001 | 23.6±5.3%  | 13.9±3.8    | <0.0001 |
| <b>Stent diameter (mm)</b>                   | 3.13±0.35  | 3.11±0.40  | 0.89    | 3.13±0.41  | 3.28±0.50   | 0.19    |
| - 2.0                                        | 0 (0.0%)   | 0 (0.0%)   |         | 0 (0.0%)   | 1 (3.0%)    |         |
| - 2.25                                       | 0 (0.0%)   | 0 (0.0%)   |         | 2 (6.6%)   | 0 (0.0%)    |         |
| - 2.5                                        | 6 (14.3%)  | 9 (21.9%)  |         | 1 (3.3%)   | 2 (6.1%)    |         |
| - 2.75                                       | 0 (0.0%)   | 0 (0.0%)   |         | 1 (3.3%)   | 3 (9.1%)    |         |
| - 3.0                                        | 19 (45.2%) | 14 (34.1%) |         | 16 (53.3%) | 9 (27.3%)   |         |
| - 3.5                                        | 17 (40.5%) | 18 (43.9%) |         | 8 (26.7%)  | 12 (36.4%)  |         |
| - 4.0                                        | 0 (0.0%)   | 0 (0.0%)   |         | 2 (6.7%)   | 6 (18.2%)   |         |
| <b>Stent length (mm)</b>                     | 22.42±5.57 | 22.9±5.6   | 0.69    | 21.73±8.75 | 26.2±10.5   | 0.078   |
| <b>Stent implantation pressure (atm.)</b>    | 12.9±2.6   | 13.2±2.4   | 0.65    | 13.62±2.36 | 13.3±2.7    | 0.26    |
| <b>Post-dilatations – number of lesions</b>  | 30/32      | 26/30      |         | 11/22      | 20/26       |         |
| <b>Post-dilatations – number of balloons</b> | 44         | 40         |         | 13         | 28          |         |
| <b>Post-dilatation balloon diameter (mm)</b> | 3.75±0.52  | 3.41±0.51  | 0.97    | 3.23±0.48  | 3.51±0.75   | 0.056   |
| - 2.0                                        | 1 (2.3%)   | 0 (0.0%)   |         | 0 (0.0%)   | 1 (3.57%)   |         |
| - 2.5                                        | 3 (6.8%)   | 2 (5.0%)   |         | 2 (15.4%)  | 1 (3.57%)   |         |
| - 3.0                                        | 11 (25.0%) | 15 (37.5%) |         | 5 (38.5%)  | 3 (10.71%)  |         |
| - 3.5                                        | 23 (52.3%) | 14 (35.0%) |         | 4 (20.8%)  | 15 (53.57%) |         |
| - 4.0                                        | 4 (9.1%)   | 7 (17.5%)  |         | 2 (15.4%)  | 7 (25.00%)  |         |
| - 4.5                                        | 1 (2.3%)   | 1 (2.5%)   |         | 0 (0.0%)   | 1 (3.57%)   |         |
| - 5.0                                        | 1 (2.3%)   | 1 (2.5%)   |         | 0 (0.0%)   | 0 (0.00%)   |         |
| <b>Post-dilatation pressure (atm.)</b>       | 23.6±8.7   | 26.1±8.0   | 0.14    | 20.5±7.1   | 19.3±7.7    | 0.38    |
